# Supplementary material
Source: PubMed Central journal article supplement (PMC5635830)

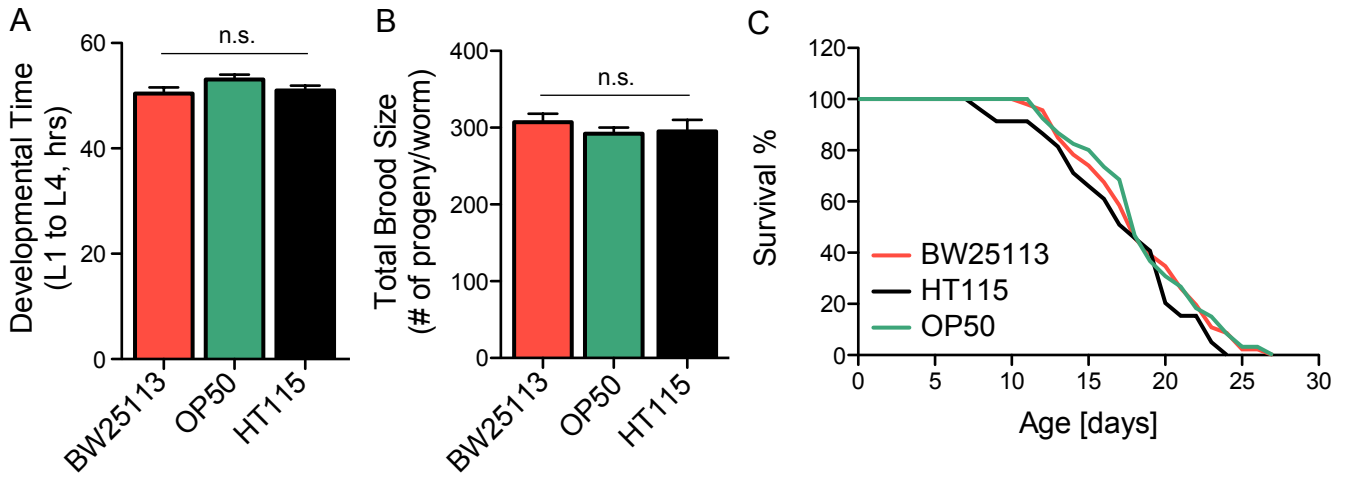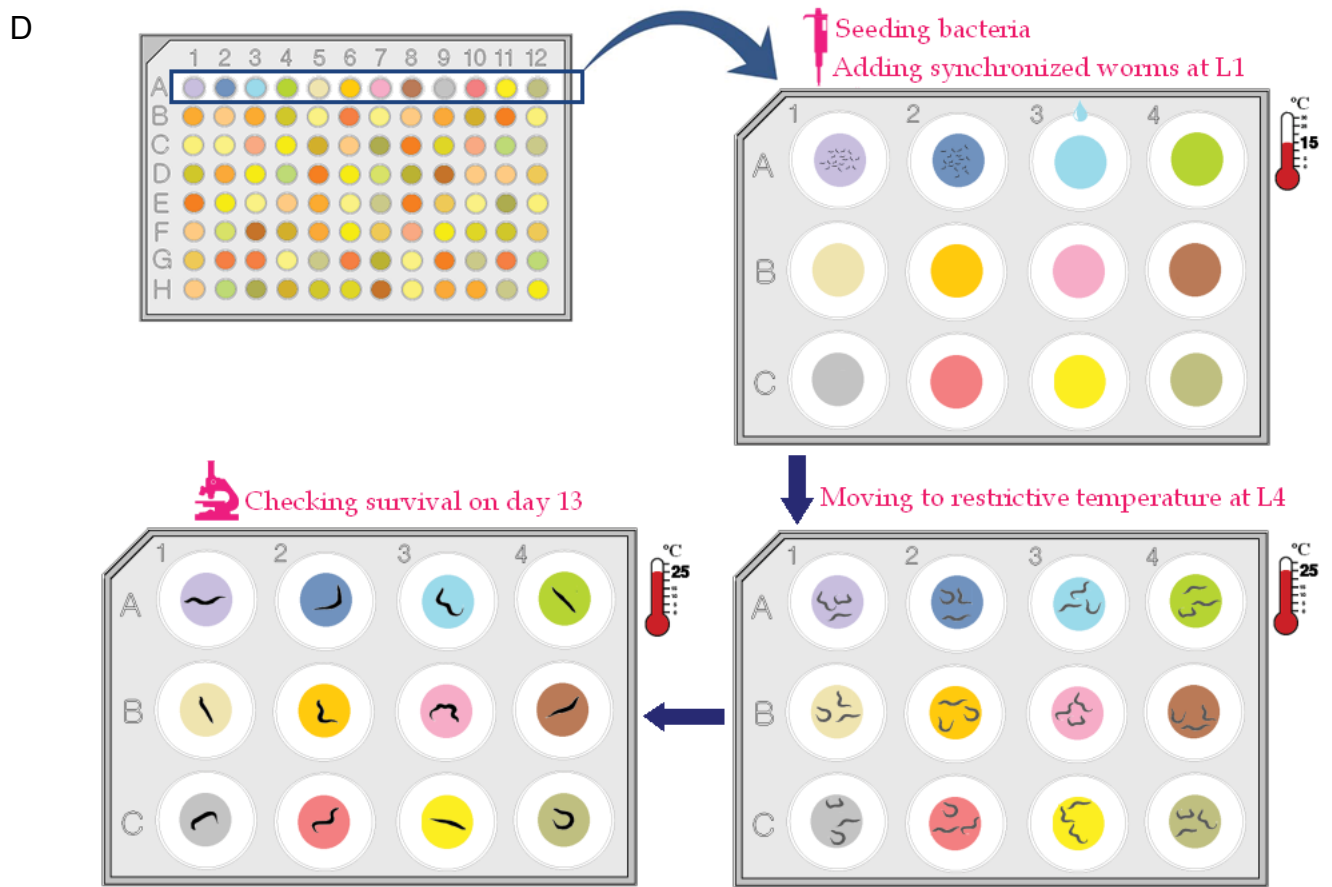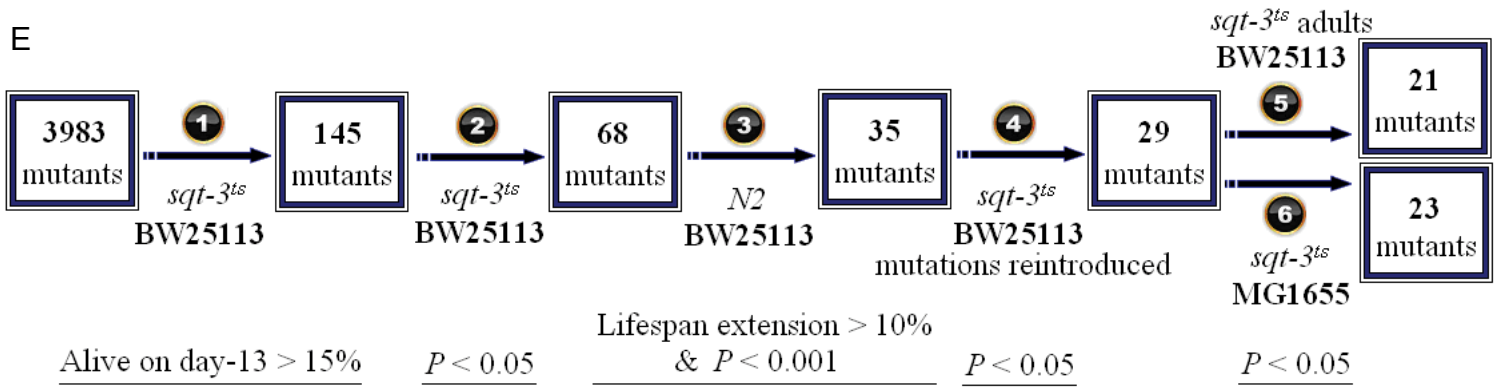

Supplement: NIHMS880062-supplement-2.pdf [file NIHMS880062-supplement-2.pdf]

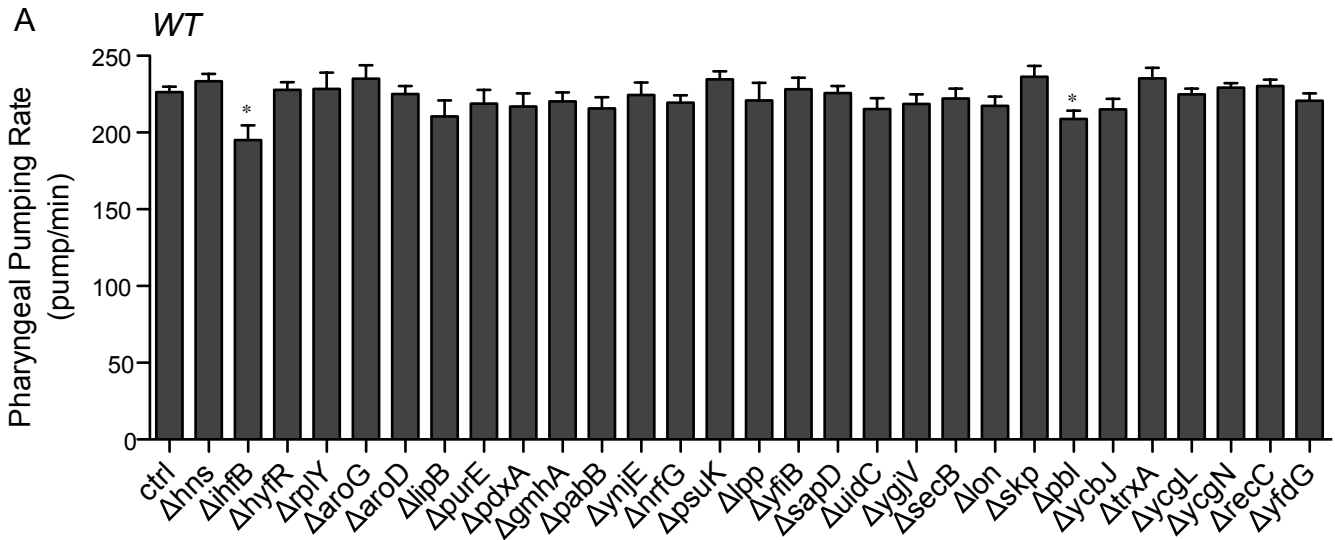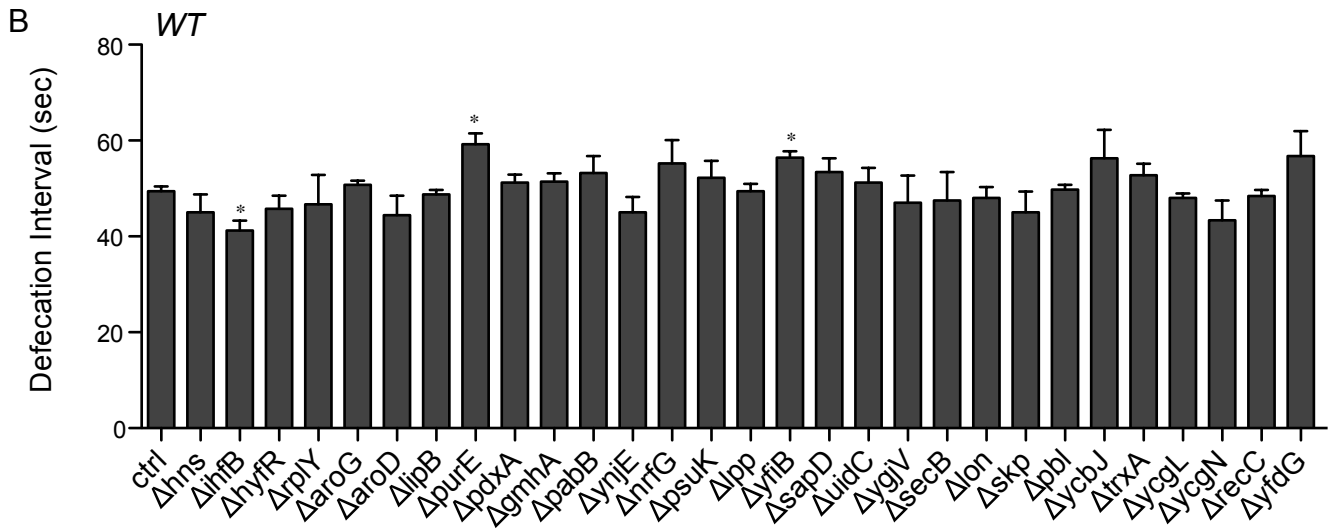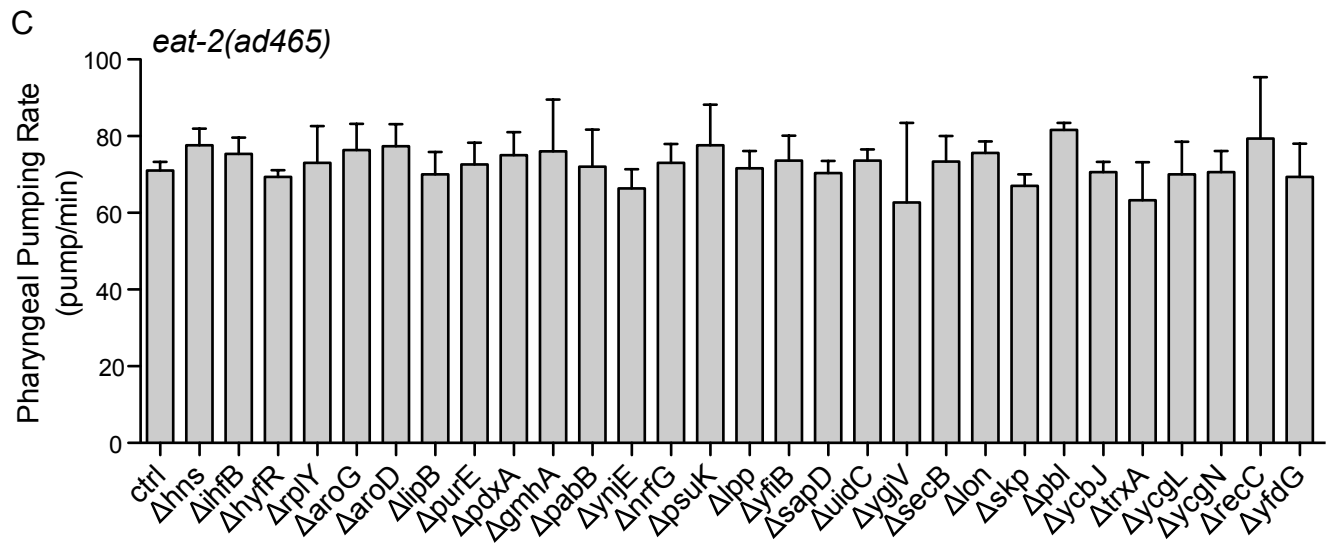

Supplement: NIHMS880062-supplement-4.pdf [file NIHMS880062-supplement-4.pdf]

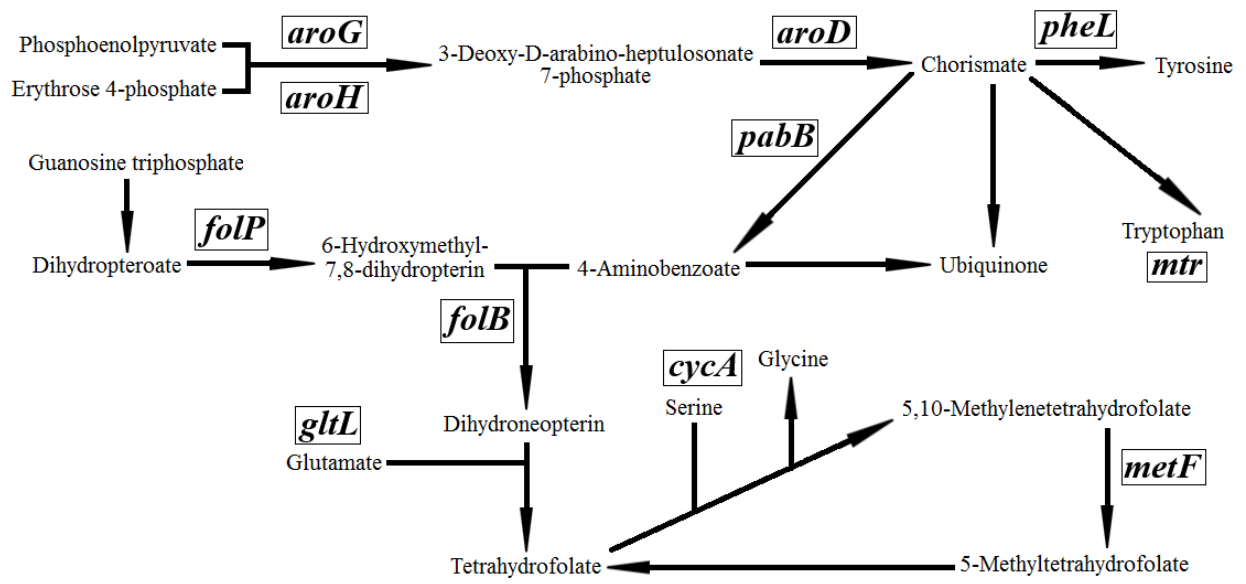

Supplement: NIHMS880062-supplement-8.pdf [file NIHMS880062-supplement-8.pdf]
